# Supplementary material
Source: PubMed Central journal article supplement (PMC8765226)

**Supplemental Figure. Scoring method used for interpretation of planktonic phage susceptibility.** Unaffected bacterial growth (NA) and zones of growth attenuation (ZGA) were recorded as no activity, while phage treatment that yielded observable activity was recorded as exhibiting plaques (P) or a zone of clearance (ZC).

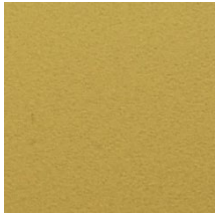

NA

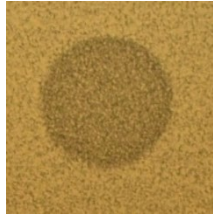

ZGA

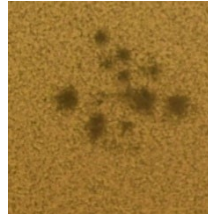

P

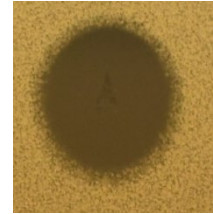

ZC

**Supplemental Table.** Planktonic phage susceptibility across all isolates tested. Cells corresponding to susceptibility are in blue and those corresponding to non-susceptibility are in yellow.

| IDRL Number | 27698-B1 | 27695-B1 | 27704-B1 | 11988-B1 | 27703-B1 | 23360-B1 | 19685-B1 |
|-------------|----------|----------|----------|----------|----------|----------|----------|
| IDRL-5965   | Blue     | Yellow   | Yellow   | Yellow   | Yellow   | Blue     | Blue     |
| IDRL-5994   | Yellow   | Yellow   | Yellow   | Yellow   | Yellow   | Blue     | Blue     |
| IDRL-5996   | Yellow   | Blue     | Yellow   | Yellow   | Yellow   | Blue     | Blue     |
| IDRL-5999   | Yellow   | Yellow   | Yellow   | Blue     | Yellow   | Blue     | Blue     |
| IDRL-6013   | Yellow   |
| IDRL-6018   | Blue     | Yellow   | Yellow   | Blue     | Yellow   | Blue     | Blue     |
| IDRL-6060   | Yellow   |
| IDRL-6077   | Blue     | Blue     | Yellow   | Yellow   | Yellow   | Blue     | Blue     |
| IDRL-6083   | Yellow   | Yellow   | Yellow   | Yellow   | Yellow   | Yellow   | Blue     |
| IDRL-6085   | Yellow   |
| IDRL-6086   | Yellow   | Yellow   | Yellow   | Blue     | Yellow   | Blue     | Blue     |
| IDRL-6094   | Blue     | Yellow   | Yellow   | Blue     | Yellow   | Blue     | Blue     |
| IDRL-6096   | Yellow   |
| IDRL-6105   | Yellow   |
| IDRL-6106   | Yellow   | Yellow   | Yellow   | Blue     | Yellow   | Blue     | Blue     |
| IDRL-6111   | Yellow   | Yellow   | Yellow   | Blue     | Yellow   | Blue     | Blue     |
| IDRL-6129   | Yellow   | Yellow   | Yellow   | Yellow   | Yellow   | Blue     | Blue     |
| IDRL-6148   | Yellow   | Yellow   | Yellow   | Blue     | Yellow   | Blue     | Blue     |
| IDRL-6152   | Yellow   | Yellow   | Yellow   | Blue     | Blue     | Blue     | Blue     |
| IDRL-6153   | Yellow   | Yellow   | Yellow   | Blue     | Yellow   | Blue     | Blue     |
| IDRL-6161   | Blue     | Yellow   | Yellow   | Blue     | Yellow   | Blue     | Blue     |
| IDRL-6164   | Blue     | Yellow   | Yellow   | Blue     | Yellow   | Blue     | Blue     |
| IDRL-6172   | Yellow   |
| IDRL-6175   | Yellow   |
| IDRL-6178   | Blue     |
| IDRL-6179   | Yellow   | Yellow   | Yellow   | Yellow   | Yellow   | Blue     | Blue     |
| IDRL-6184   | Yellow   | Yellow   | Yellow   | Yellow   | Yellow   | Yellow   | Blue     |
| IDRL-6190   | Yellow   | Yellow   | Yellow   | Blue     | Yellow   | Blue     | Blue     |
| IDRL-6192   | Yellow   | Blue     | Yellow   | Yellow   | Yellow   | Blue     | Blue     |
| IDRL-6193   | Yellow   | Yellow   | Yellow   | Blue     | Yellow   | Blue     | Blue     |
| IDRL-6149   | Yellow   |
| IDRL-6195   | Yellow   | Blue     | Yellow   | Yellow   | Yellow   | Yellow   | Blue     |
| IDRL-6200   | Yellow   |
| IDRL-6203   | Yellow   | Blue     | Yellow   | Yellow   | Yellow   | Blue     | Blue     |
| IDRL-6220   | Blue     | Blue     | Yellow   | Yellow   | Yellow   | Blue     | Blue     |

|           |  |  |  |  |  |  |  |
|-----------|--|--|--|--|--|--|--|
| IDRL-6231 |  |  |  |  |  |  |  |
| IDRL-6234 |  |  |  |  |  |  |  |
| IDRL-6440 |  |  |  |  |  |  |  |
| IDRL-6455 |  |  |  |  |  |  |  |
| IDRL-6487 |  |  |  |  |  |  |  |
| IDRL-6926 |  |  |  |  |  |  |  |
| IDRL-6934 |  |  |  |  |  |  |  |
| IDRL-7223 |  |  |  |  |  |  |  |
| IDRL-7377 |  |  |  |  |  |  |  |
| IDRL-7485 |  |  |  |  |  |  |  |
| IDRL-7490 |  |  |  |  |  |  |  |
| IDRL-7518 |  |  |  |  |  |  |  |
| IDRL-7542 |  |  |  |  |  |  |  |
| IDRL-7603 |  |  |  |  |  |  |  |
| IDRL-7659 |  |  |  |  |  |  |  |
| IDRL-7732 |  |  |  |  |  |  |  |
| IDRL-7762 |  |  |  |  |  |  |  |
| IDRL-7805 |  |  |  |  |  |  |  |
| IDRL-7808 |  |  |  |  |  |  |  |
| IDRL-8069 |  |  |  |  |  |  |  |
| IDRL-8282 |  |  |  |  |  |  |  |
| IDRL-8454 |  |  |  |  |  |  |  |
| IDRL-8560 |  |  |  |  |  |  |  |
| IDRL-8621 |  |  |  |  |  |  |  |
| IDRL-8758 |  |  |  |  |  |  |  |
| IDRL-8900 |  |  |  |  |  |  |  |
| IDRL-8913 |  |  |  |  |  |  |  |
| IDRL-8956 |  |  |  |  |  |  |  |
| IDRL-8960 |  |  |  |  |  |  |  |
| IDRL-9057 |  |  |  |  |  |  |  |
| IDRL-9067 |  |  |  |  |  |  |  |
| IDRL-9072 |  |  |  |  |  |  |  |
| IDRL-9101 |  |  |  |  |  |  |  |
| IDRL-9121 |  |  |  |  |  |  |  |
| IDRL-9219 |  |  |  |  |  |  |  |
| IDRL-9338 |  |  |  |  |  |  |  |
| IDRL-9384 |  |  |  |  |  |  |  |
| IDRL-9406 |  |  |  |  |  |  |  |
| IDRL-9419 |  |  |  |  |  |  |  |
| IDRL-9422 |  |  |  |  |  |  |  |
| IDRL-9446 |  |  |  |  |  |  |  |
| IDRL-9462 |  |  |  |  |  |  |  |
| IDRL-9463 |  |  |  |  |  |  |  |

|            |  |  |  |  |  |  |  |
|------------|--|--|--|--|--|--|--|
| IDRL-9472  |  |  |  |  |  |  |  |
| IDRL-9476  |  |  |  |  |  |  |  |
| IDRL-9478  |  |  |  |  |  |  |  |
| IDRL-9502  |  |  |  |  |  |  |  |
| IDRL-9535  |  |  |  |  |  |  |  |
| IDRL-9548  |  |  |  |  |  |  |  |
| IDRL-9553  |  |  |  |  |  |  |  |
| IDRL-9572  |  |  |  |  |  |  |  |
| IDRL-9591  |  |  |  |  |  |  |  |
| IDRL-9596  |  |  |  |  |  |  |  |
| IDRL-9598  |  |  |  |  |  |  |  |
| IDRL-9602  |  |  |  |  |  |  |  |
| IDRL-9610  |  |  |  |  |  |  |  |
| IDRL-9611  |  |  |  |  |  |  |  |
| IDRL-9646  |  |  |  |  |  |  |  |
| IDRL-9658  |  |  |  |  |  |  |  |
| IDRL-9746  |  |  |  |  |  |  |  |
| IDRL-9756  |  |  |  |  |  |  |  |
| IDRL-9760  |  |  |  |  |  |  |  |
| IDRL-9783  |  |  |  |  |  |  |  |
| IDRL-9813  |  |  |  |  |  |  |  |
| IDRL-10094 |  |  |  |  |  |  |  |
| IDRL-10095 |  |  |  |  |  |  |  |
| IDRL-10116 |  |  |  |  |  |  |  |
| IDRL-10277 |  |  |  |  |  |  |  |
| IDRL-10758 |  |  |  |  |  |  |  |
| IDRL-10947 |  |  |  |  |  |  |  |
| IDRL-10982 |  |  |  |  |  |  |  |
| IDRL-11113 |  |  |  |  |  |  |  |
| IDRL-11367 |  |  |  |  |  |  |  |
| IDRL-11445 |  |  |  |  |  |  |  |
| IDRL-11468 |  |  |  |  |  |  |  |
| IDRL-11531 |  |  |  |  |  |  |  |
| IDRL-11573 |  |  |  |  |  |  |  |
| IDRL-11588 |  |  |  |  |  |  |  |
| IDRL-11603 |  |  |  |  |  |  |  |
| IDRL-11729 |  |  |  |  |  |  |  |
| IDRL-11730 |  |  |  |  |  |  |  |
| IDRL-11822 |  |  |  |  |  |  |  |
| IDRL-11823 |  |  |  |  |  |  |  |
| IDRL-11825 |  |  |  |  |  |  |  |
| IDRL-11842 |  |  |  |  |  |  |  |
| IDRL-11849 |  |  |  |  |  |  |  |

IDRL-11861

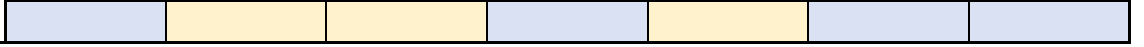

Supplement: aac.01879-21-s0001.pdf [file aac.01879-21-s0001.pdf]
